# Supplementary material for: Ca2+ signaling driving pacemaker activity in submucosal interstitial cells of Cajal in the murine colon
Source: eLife. 2021 Jan 5;10:e64099. doi: 10.7554/eLife.64099 (PMC7806270; doi:10.7554/eLife.64099)
Supplement: Supplementary file 1. [file elife-64099-supp1.docx]

| **Gene** | **Primer Sequence** | **GenBank Accession Number** |
| --- | --- | --- |
| *Kit* | | F-CGCCTGCCGAAATGTATGACG | | --- | | R-GGTTCTCTGGGTTGGGGTTGC | | NM_021099 |
| *Ano1* | | F-TAACCCTGCCACCGTCTTCT | | --- | | R-ATGATCCTTGACAGCTTCCTCC | | NM_178642 |
| *Myh11* | | F-CCCAAGCAGCTAAAGGACAA | | --- | | R-AGGCACTTGCATTGTAGTCC | | | NM_013607 |
| *Uchl1* | | F-CGATGGAGATTAACCCCGAGATG | | --- | | R-TTTTCATGCTGGGCCGTGAG | | NM_011670 |
| *Cacna1c* | | F-GTAAGGATGAGTGAAGAAGCCGAGTAC | | --- | | R-CAGAGCGAAGGAAACTCCTCTTTGG | | NM_009781 |
| *Cacna1d* | | F-ACCAAAGAAACAGAAGGCGG | | --- | | R-TGTAAACTGGGCACTCCTGA | | | NM_028981 |
| *Cacna1g* | | F-ACAACGGCATGGCCTCCACGT | | --- | | R-CCGTTTGCCGATTTCCTCTGCCTG | | NM_021415 |
| *Cacna1h* | | F-TGGAGACCTACACAGGCCCGGT | | --- | | R-CAGAGAGCGGGGCGTATCC | | NM_001044308 |
| *Orai1* | | F-GTTCACTTCTACCGCTCCCT | | --- | | R-GTGCCCGGTGTTAGAGAATG | | NM_175423 |
| *Orai2* | | F-CACAAGGGCATGGATTACCG | | --- | | R-CCCTGCTCAGGTAGAGCTTC | | NM_178751 |
| *Orai3* | | F-GGCTGAAGTTGTTCTGGTGG | | --- | | R-TGGAAGGCTGTTGTGATGTG | | NM_198424 |
|  |  |  |
