# Supplementary figures and images for: Ca2+ signaling driving pacemaker activity in submucosal interstitial cells of Cajal in the murine colon
Source: eLife journal article supplement (doi:10.7554/elife.64099), 2021-01-05

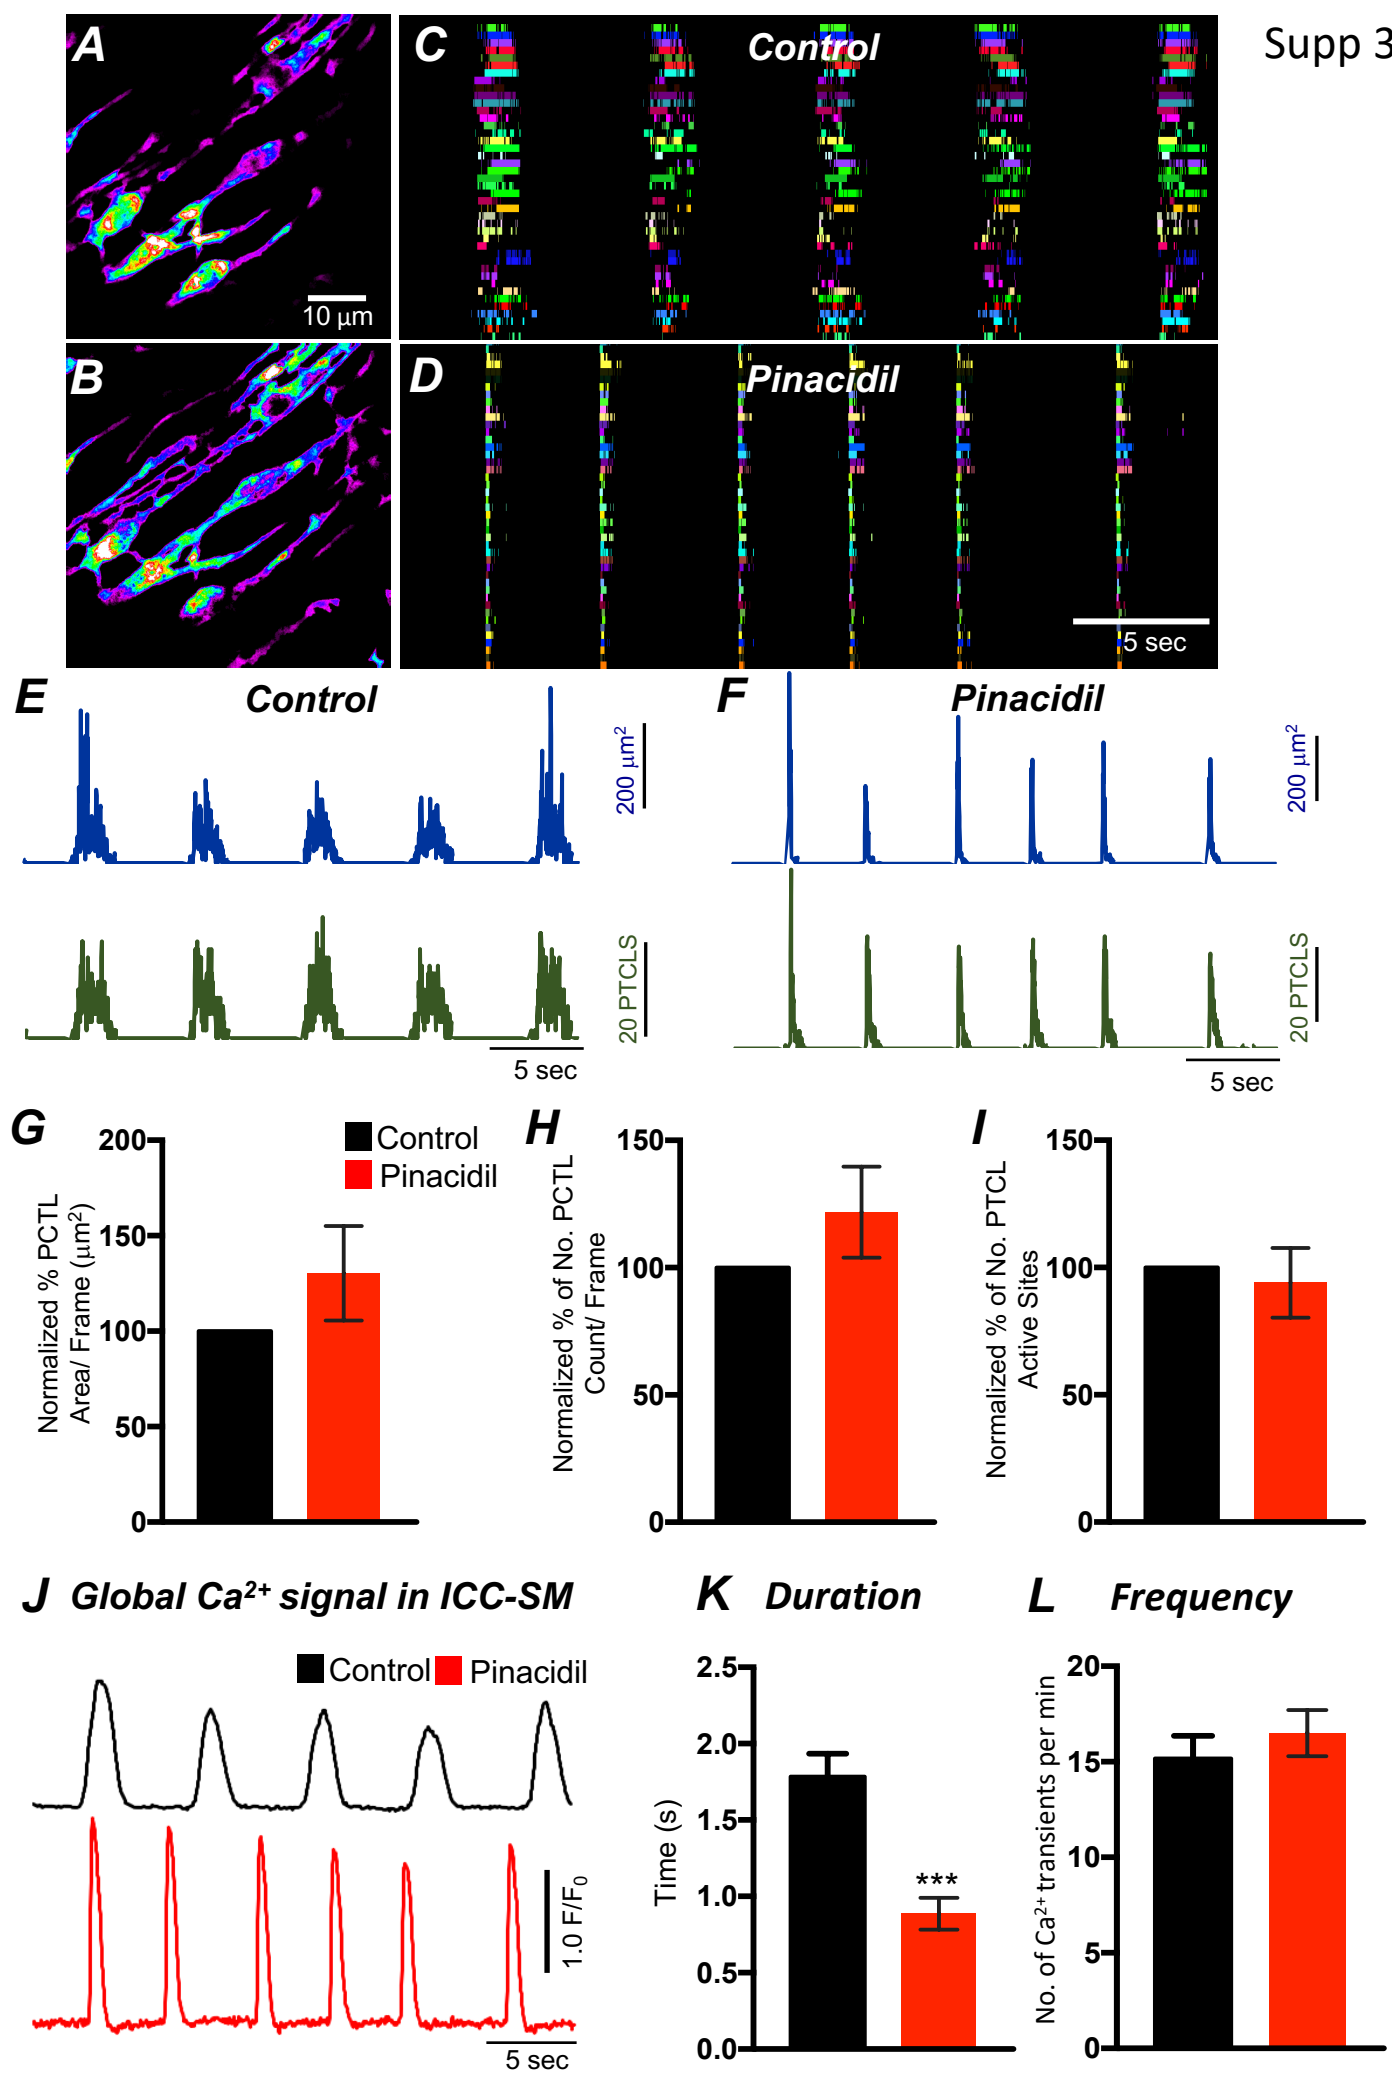

Supplement: supp [file elife_poa_e64099_Figure_11_figure_supplement_1.pdf › elife_poa_e64099_Figure_11_figure_supplement_1.pdf]

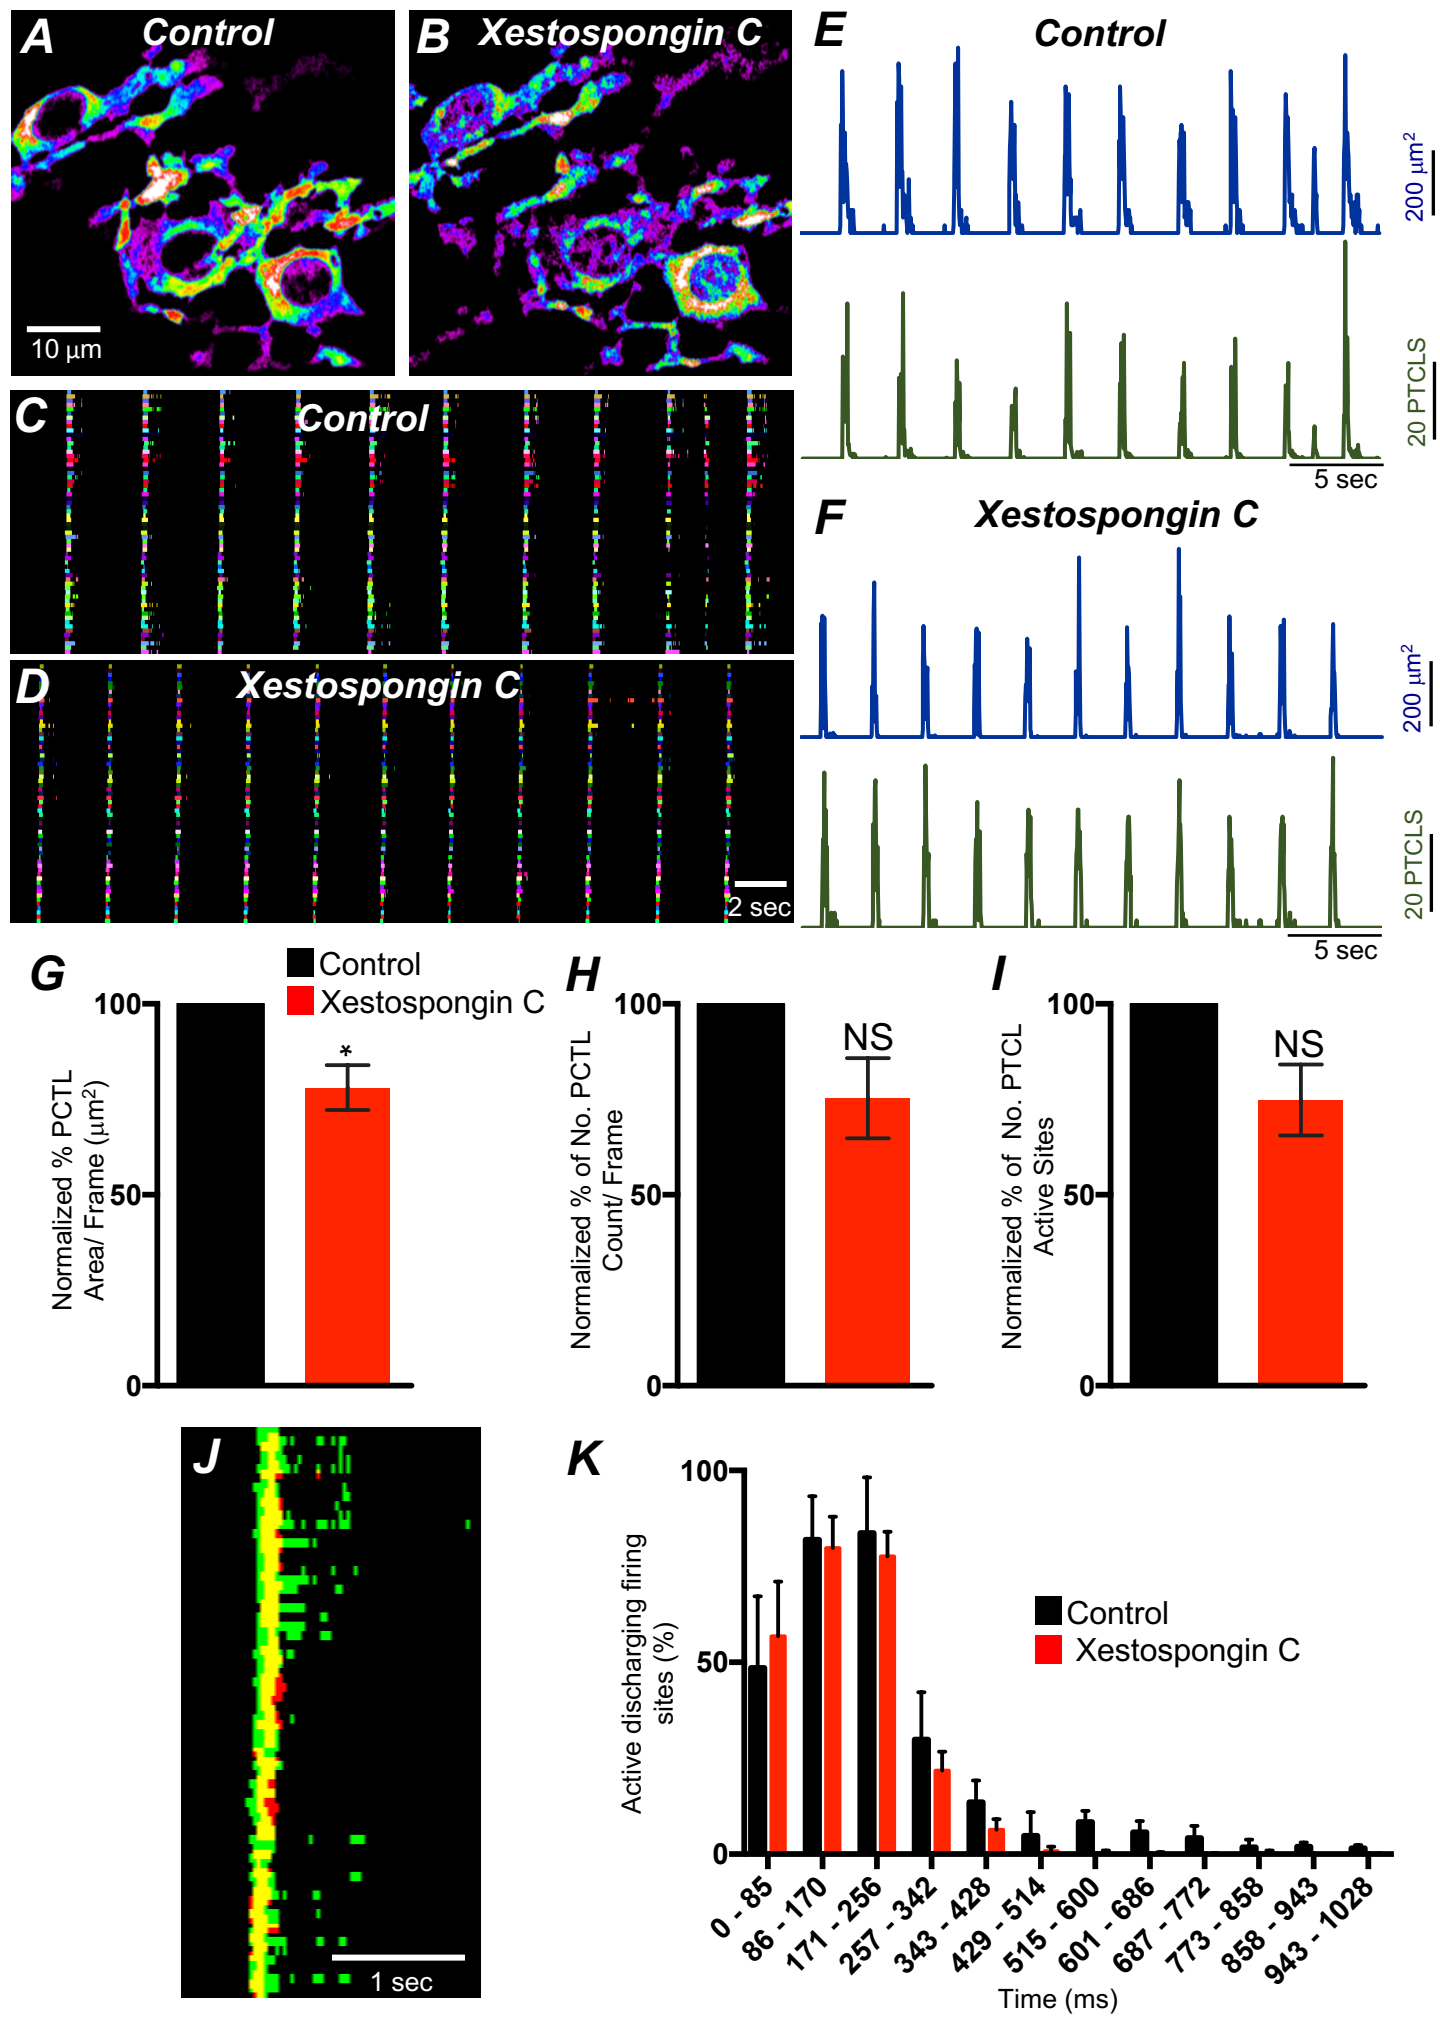

Supplement: supp [file elife_poa_e64099_Figure_13_figure_supplement_1.pdf › elife_poa_e64099_Figure_13_figure_supplement_1.pdf]

**A 2-APB**

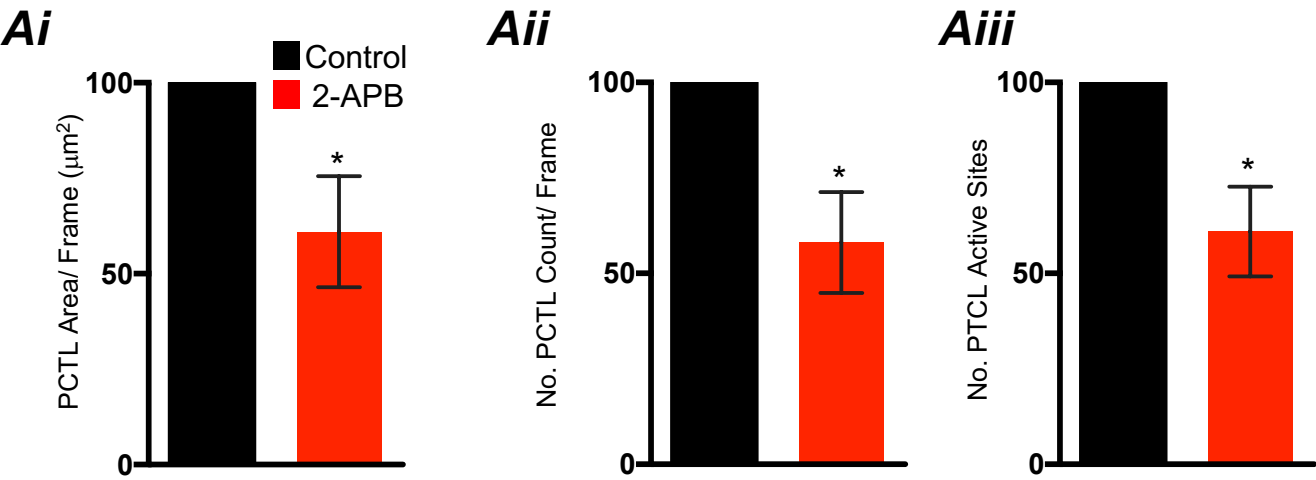

**B Tetracaine**

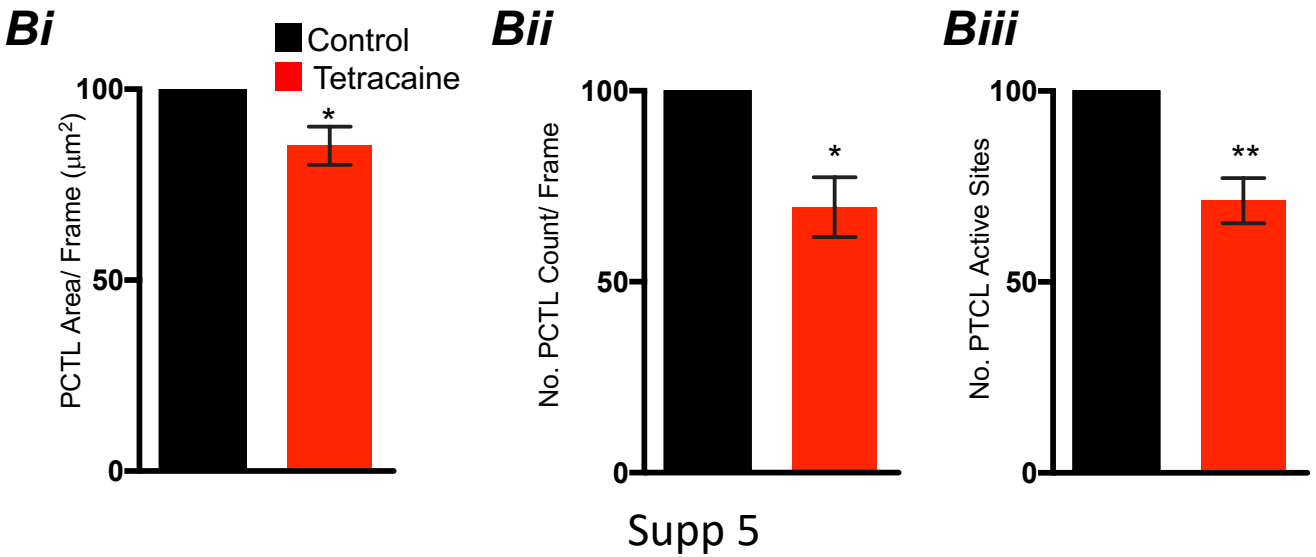

Supplement: supp [file elife_poa_e64099_Figure_13_figure_supplement_2.pdf › elife_poa_e64099_Figure_13_figure_supplement_2.pdf]

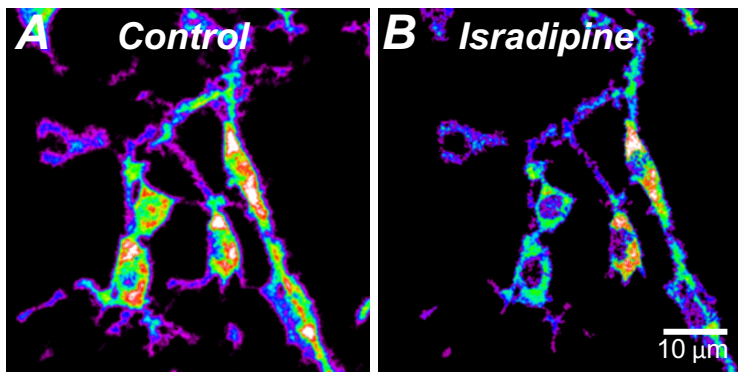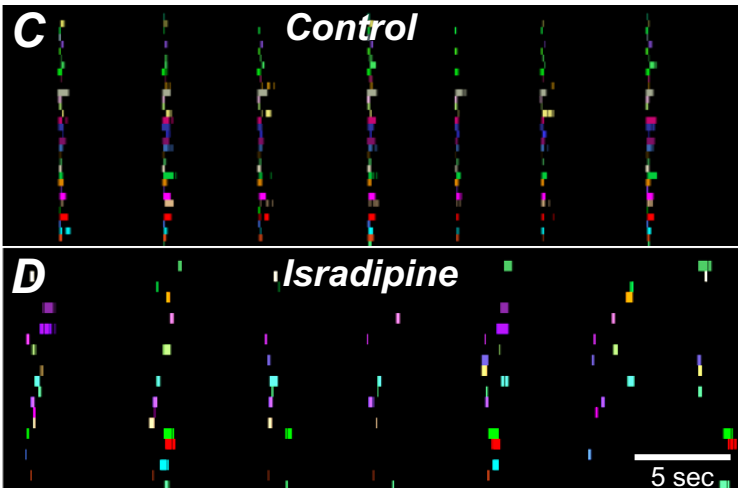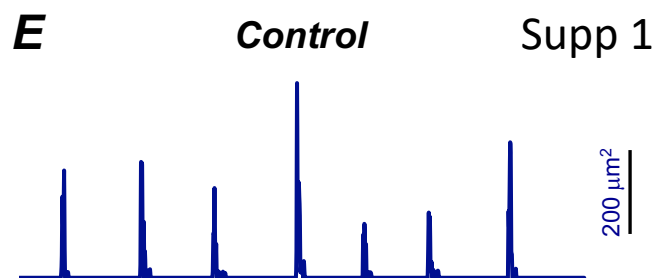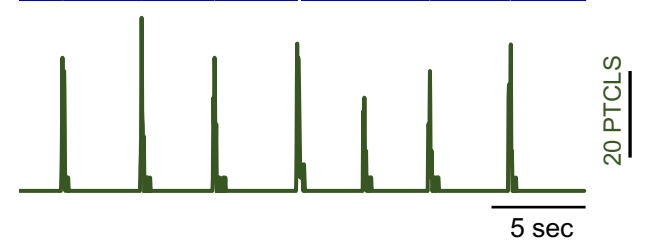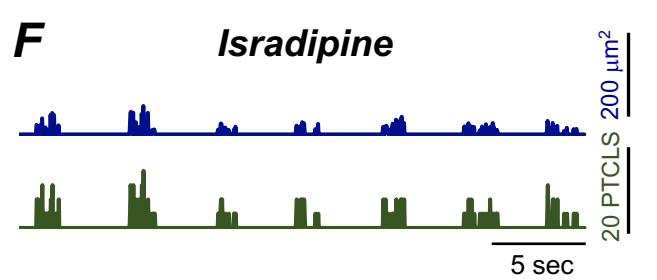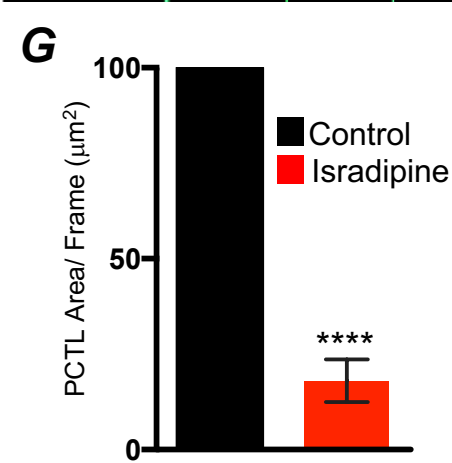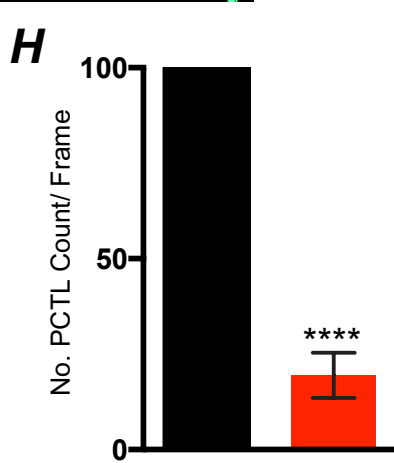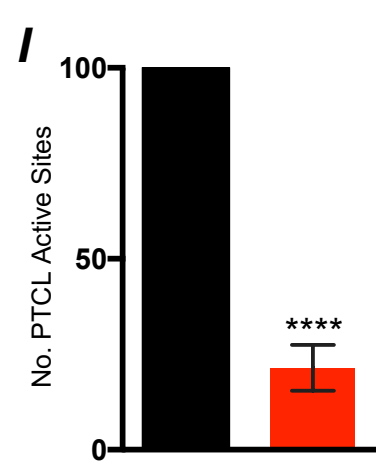

Supplement: supp [file elife_poa_e64099_Figure_9_figure_supplement_1.pdf › elife_poa_e64099_Figure_9_figure_supplement_1.pdf]
